# Supplementary material for: Relationship of body mass index and visceral fat area combination with arterial stiffness and cardiovascular risk in cardiovascular disease-free people: NHANES (2011–2018)
Source: PubMed Central journal article supplement — Endocr Connect. 2023 Oct 3;12(11):e230291. doi: 10.1530/EC-23-0291 (PMC10563637; doi:10.1530/ec-23-0291), 2023-10-03
Supplement: supplementary_tables.pdf [file supplementary_tables.pdf]

**Table S1 Characteristic distribution of participants in NHANES 2011-2018, weighted (population size represented N=144,907,159) (supplement for Table 1)**

| variables                              | All                     | Normal Weight           |                         | Overweight              |                         | Obese grade 1           |                         | Obese grade 2           |                         | P-value |
|----------------------------------------|-------------------------|-------------------------|-------------------------|-------------------------|-------------------------|-------------------------|-------------------------|-------------------------|-------------------------|---------|
|                                        |                         | Normal visceral fat     | Visceral obesity        |         |
| <b>Family income Ratio</b>             | 2.88 (2.76 ,3.00)       | 2.93 (2.75 ,3.12)       | 3.08 (2.59 ,3.57)       | 2.90 (2.71 ,3.08)       | 3.09 (2.90 ,3.29)       | 2.75 (2.49 ,3.02)       | 2.91 (2.74 ,3.08)       | 2.13 (1.86 ,2.39)       | 2.71 (2.52 ,2.90)       | <0.0001 |
| <b>Systolic blood pressure (mmHg)</b>  | 118.33 (117.74 ,118.93) | 112.84 (112.11 ,113.58) | 123.94 (119.35 ,128.53) | 115.90 (114.72 ,117.09) | 120.43 (119.23 ,121.64) | 118.05 (116.47 ,119.63) | 122.97 (121.69 ,124.24) | 120.06 (117.36 ,122.77) | 125.34 (123.86 ,126.81) | <0.0001 |
| <b>Diastolic blood pressure(mmHg )</b> | 70.85 (70.33 ,71.36)    | 67.02 (66.46 ,67.58)    | 75.28 (71.58 ,78.99)    | 68.41 (67.44 ,69.37)    | 73.80 (72.91 ,74.68)    | 68.83 (67.33 ,70.34)    | 74.68 (73.59 ,75.76)    | 71.07 (68.89 ,73.25)    | 75.07 (73.88 ,76.27)    | <0.0001 |
| <b>Race(%)</b>                         |                         |                         |                         |                         |                         |                         |                         |                         |                         | <0.0001 |
| Mexican American                       | 10.07 (8.05 ,12.51)     | 6.45 (4.98 ,8.32)       | 7.56 (3.91 ,14.12)      | 9.69 (7.07 ,13.14)      | 12.60 (9.84 ,15.99)     | 12.10 (7.09 ,19.89)     | 13.83 (10.48 ,18.04)    | 6.44 (2.60 ,15.06)      | 12.14 (9.46 ,15.46)     |         |

|                           |                      |                      |                      |                      |                      |                      |                      |                      |                      |         |
|---------------------------|----------------------|----------------------|----------------------|----------------------|----------------------|----------------------|----------------------|----------------------|----------------------|---------|
| Other Hispanic            | 7.19 (5.72 ,9.01)    | 6.85 (5.09 ,9.15)    | 4.93 (1.85 ,12.48)   | 6.66 (4.91 ,8.96)    | 8.63 (6.44 ,11.47)   | 9.05 (5.41 ,14.76)   | 8.00 (5.95 ,10.67)   | 6.65 (3.24 ,13.17)   | 5.82 (4.28 ,7.86)    |         |
| Non-Hispanic White        | 61.49 (57.48 ,65.35) | 62.83 (58.30 ,67.15) | 68.07 (57.35 ,77.16) | 59.23 (53.84 ,64.41) | 64.31 (59.08 ,69.22) | 47.77 (38.75 ,56.93) | 65.11 (58.71 ,71.00) | 29.10 (19.43 ,41.12) | 64.90 (59.66 ,69.79) |         |
| Non-Hispanic Black        | 11.72 (9.72 ,14.05)  | 9.98 (7.96 ,12.46)   | 4.69 (2.50 ,8.62)    | 16.12 (13.43 ,19.23) | 3.91 (2.90 ,5.27)    | 25.07 (18.36 ,33.25) | 6.98 (5.38 ,9.00)    | 50.57 (39.30 ,61.79) | 12.70 (9.83 ,16.25)  |         |
| Other Race                | 9.53 (8.33 ,10.89)   | 13.89 (11.96 ,16.07) | 14.75 (9.63 ,21.92)  | 8.30 (6.45 ,10.62)   | 10.55 (7.97 ,13.84)  | 6.01 (3.75 ,9.49)    | 6.09 (3.96 ,9.25)    | 7.24 (3.17 ,15.67)   | 4.44 (3.04 ,6.44)    |         |
| <b>Education level(%)</b> |                      |                      |                      |                      |                      |                      |                      |                      |                      | <0.0001 |
| Less than 9th grade       | 3.95 (3.12 ,4.99)    | 2.67 (1.83 ,3.88)    | 3.51 (1.51 ,7.91)    | 3.37 (2.03 ,5.56)    | 6.18 (4.69 ,8.11)    | 1.51 (0.60 ,3.77)    | 6.03 (4.14 ,8.70)    | 2.61 (0.78 ,8.43)    | 4.11 (2.77 ,6.07)    |         |
| 9-11th grade              | 9.39 (7.97 ,11.04)   | 8.88 (6.55 ,11.92)   | 8.60 (4.65 ,15.38)   | 6.59 (4.88 ,8.83)    | 10.91 (7.79 ,15.07)  | 9.48 (6.58 ,13.48)   | 11.99 (8.89 ,15.99)  | 4.74 (1.30 ,15.88)   | 9.32 (7.10 ,12.14)   |         |
| High school graduate      | 21.17 (18.96 ,23.56) | 19.99 (16.71 ,23.72) | 21.64 (11.76 ,36.41) | 21.48 (17.38 ,26.23) | 20.72 (16.62 ,25.53) | 24.57 (18.47 ,31.89) | 22.21 (18.34 ,26.63) | 27.94 (19.76 ,37.90) | 20.78 (16.99 ,25.17) |         |

|                           |                      |                      |                      |                      |                      |                      |                      |                      |                      |         |
|---------------------------|----------------------|----------------------|----------------------|----------------------|----------------------|----------------------|----------------------|----------------------|----------------------|---------|
| Some college or AA degree | 32.66 (30.39 ,35.02) | 28.33 (24.59 ,32.40) | 33.09 (20.62 ,48.48) | 30.50 (26.40 ,34.94) | 31.38 (27.26 ,35.81) | 34.48 (27.70 ,41.96) | 33.92 (29.27 ,38.89) | 47.82 (38.00 ,57.82) | 40.01 (35.06 ,45.18) |         |
| College graduate or above | 32.82 (29.60 ,36.21) | 40.13 (35.12 ,45.36) | 33.16 (21.38 ,47.51) | 38.06 (33.31 ,43.04) | 30.81 (25.54 ,36.62) | 29.95 (23.58 ,37.19) | 25.86 (21.69 ,30.52) | 16.88 (10.72 ,25.56) | 25.77 (20.62 ,31.69) |         |
| <b>Marital status(%)</b>  |                      |                      |                      |                      |                      |                      |                      |                      |                      | <0.0001 |
| Married                   | 51.69 (48.73 ,54.64) | 45.40 (40.74 ,50.14) | 59.08 (45.21 ,71.63) | 48.83 (44.30 ,53.37) | 60.56 (54.58 ,66.23) | 43.18 (34.43 ,52.37) | 57.90 (52.10 ,63.49) | 31.26 (21.99 ,42.32) | 56.72 (51.44 ,61.84) |         |
| Widowed                   | 1.20 (0.94 ,1.53)    | 1.05 (0.56 ,1.94)    | 1.07 (0.23 ,4.86)    | 0.44 (0.21 ,0.92)    | 2.83 (1.29 ,6.10)    | 0.71 (0.24 ,2.07)    | 1.42 (0.67 ,2.98)    | 0.62 (0.08 ,4.73)    | 0.83 (0.49 ,1.41)    |         |
| Divorced                  | 8.98 (7.79 ,10.33)   | 6.31 (4.61 ,8.59)    | 9.98 (5.00 ,18.94)   | 8.15 (5.83 ,11.28)   | 11.99 (8.99 ,15.82)  | 5.67 (2.93 ,10.68)   | 12.67 (9.14 ,17.30)  | 7.69 (3.59 ,15.69)   | 9.63 (6.78 ,13.50)   |         |
| Separated                 | 2.47 (1.95 ,3.13)    | 2.72 (1.82 ,4.04)    | 1.60 (0.53 ,4.69)    | 1.66 (0.96 ,2.84)    | 2.71 (1.72 ,4.26)    | 1.87 (0.70 ,4.89)    | 2.56 (1.54 ,4.23)    | 2.71 (0.90 ,7.86)    | 3.16 (1.89 ,5.25)    |         |
| Never married             | 25.02 (22.89 ,27.29) | 34.03 (30.53 ,37.71) | 19.52 (10.11 ,34.34) | 27.15 (23.14 ,31.56) | 12.21 (9.27 ,15.92)  | 32.76 (26.21 ,40.05) | 17.75 (14.05 ,22.19) | 45.03 (34.79 ,55.70) | 19.96 (15.86 ,24.80) |         |
| Living with partner       | 10.64 (9.32 ,12.12)  | 10.49 (8.13 ,13.44)  | 8.76 (4.33 ,16.90)   | 13.78 (10.59 ,17.74) | 9.69 (7.34 ,12.69)   | 15.81 (10.26 ,23.58) | 7.69 (5.69 ,10.32)   | 12.69 (6.82 ,22.40)  | 9.70 (7.60 ,12.30)   |         |

|                                                   |                         |                         |                         |                         |                         |                         |                         |                         |                         |         |
|---------------------------------------------------|-------------------------|-------------------------|-------------------------|-------------------------|-------------------------|-------------------------|-------------------------|-------------------------|-------------------------|---------|
| <b>Leisure time<br/>Physical activity<br/>(%)</b> |                         |                         |                         |                         |                         |                         |                         |                         |                         | <0.0001 |
| inactive                                          | 41.32 (38.98<br>,43.70) | 33.22 (29.39<br>,37.28) | 44.44 (32.95<br>,56.56) | 30.98 (27.16<br>,35.09) | 47.72 (42.45<br>,53.04) | 38.16 (31.23<br>,45.61) | 51.62 (46.38<br>,56.81) | 41.59 (32.91<br>,50.83) | 52.74 (48.38<br>,57.06) |         |
| Less active                                       | 17.97 (16.47<br>,19.58) | 17.29 (14.76<br>,20.15) | 26.12 (16.05<br>,39.53) | 16.88 (13.81<br>,20.47) | 19.24 (15.83<br>,23.17) | 13.10 (8.73<br>,19.18)  | 18.79 (15.28<br>,22.89) | 11.12 (6.94<br>,17.35)  | 19.83 (16.02<br>,24.28) |         |
| active                                            | 40.67 (38.54<br>,42.83) | 49.41 (44.97<br>,53.87) | 29.44 (20.01<br>,41.02) | 52.09 (48.29<br>,55.86) | 33.04 (28.36<br>,38.09) | 48.75 (41.67<br>,55.88) | 29.60 (25.29<br>,34.30) | 47.29 (37.48<br>,57.32) | 27.36 (23.12<br>,32.04) |         |
| <b>Smoking(%)</b>                                 |                         |                         |                         |                         |                         |                         |                         |                         |                         | <0.0001 |
| None-smoker                                       | 59.36 (57.03<br>,61.65) | 62.56 (58.32<br>,66.62) | 43.47 (32.29<br>,55.35) | 62.44 (58.34<br>,66.37) | 50.10 (46.08<br>,54.11) | 62.88 (55.42<br>,69.78) | 59.43 (54.49<br>,64.18) | 65.52 (55.14<br>,74.60) | 58.90 (53.60<br>,64.01) |         |
| Past smoker                                       | 19.64 (18.04<br>,21.34) | 14.99 (12.38<br>,18.04) | 21.66 (12.31<br>,35.26) | 18.80 (15.54<br>,22.56) | 28.12 (23.61<br>,33.12) | 14.21 (9.76<br>,20.25)  | 21.81 (18.00<br>,26.17) | 15.43 (8.40<br>,26.62)  | 22.22 (17.98<br>,27.13) |         |
| Current Smoker                                    | 19.90 (17.91<br>,22.06) | 20.49 (16.99<br>,24.50) | 34.88 (24.28<br>,47.21) | 17.21 (14.00<br>,20.97) | 21.78 (18.11<br>,25.96) | 20.28 (15.38<br>,26.25) | 18.65 (15.41<br>,22.38) | 17.88 (11.89<br>,26.01) | 18.37 (15.38<br>,21.79) |         |

|                    |                         |                         |                         |                         |                         |                         |                         |                         |                         |        |
|--------------------|-------------------------|-------------------------|-------------------------|-------------------------|-------------------------|-------------------------|-------------------------|-------------------------|-------------------------|--------|
| <b>Drinking(%)</b> |                         |                         |                         |                         |                         |                         |                         |                         |                         | 0.0183 |
| None               | 10.01 (8.51<br>,11.74)  | 10.30 (8.22<br>,12.83)  | 10.87 (4.95<br>,22.21)  | 8.18 (6.30<br>,10.57)   | 7.92 (5.69<br>,10.92)   | 14.35 (9.39<br>,21.32)  | 10.43 (7.67<br>,14.04)  | 11.29 (5.82<br>,20.76)  | 10.09 (7.46<br>,13.50)  |        |
| moderate           | 29.43 (27.22<br>,31.75) | 30.62 (26.74<br>,34.79) | 33.35 (21.90<br>,47.18) | 31.66 (26.97<br>,36.77) | 33.49 (29.46<br>,37.77) | 28.90 (23.21<br>,35.35) | 25.45 (21.40<br>,29.97) | 26.79 (19.59<br>,35.47) | 25.21 (21.48<br>,29.35) |        |
| heavy              | 49.20 (46.81<br>,51.59) | 48.49 (44.55<br>,52.45) | 45.89 (33.99<br>,58.27) | 50.99 (46.10<br>,55.86) | 45.67 (40.56<br>,50.88) | 47.54 (40.49<br>,54.68) | 52.81 (48.77<br>,56.82) | 49.39 (39.79<br>,59.02) | 49.92 (45.39<br>,54.46) |        |

For continuous variables: survey-weighted mean (95% CI) , P-value was by survey-weighted linear regression (svyglm)

For categorical variables: survey-weighted percentage (95% CI) , P-value was by survey-weighted Chi-square test (svytable)

Abbreviations: ePWV: estimated pulse wave velocity; CI, confidence interval.

**Table S2 Effect size of BMI with visceral fat area status on ePWV(cm/s) in prespecified and exploratory subgroups,weighted (supplement for Table 4)**

| Sub-group          | BMI/VFA Status                                          |                                                      |                                                      |                                                  |                                                         |                                                      |                                                         |                                                      | P-interaction |
|--------------------|---------------------------------------------------------|------------------------------------------------------|------------------------------------------------------|--------------------------------------------------|---------------------------------------------------------|------------------------------------------------------|---------------------------------------------------------|------------------------------------------------------|---------------|
|                    | normal weight normal visceral fat<br>$\beta$ (95% CI) P | normal Weight visceral obesity<br>$\beta$ (95% CI) P | overweight normal visceral fat<br>$\beta$ (95% CI) P | overweightvisceral obesity<br>$\beta$ (95% CI) P | obese grade 1 normal visceral fat<br>$\beta$ (95% CI) P | obese grade 1 visceral obesity<br>$\beta$ (95% CI) P | obese grade 2 normal visceral fat<br>$\beta$ (95% CI) P | obese grade 2 visceral obesity<br>$\beta$ (95% CI) P |               |
| Race               |                                                         |                                                      |                                                      |                                                  |                                                         |                                                      |                                                         |                                                      | <0.0001***    |
| Mexican American   | Reference<br>0.4205                                     | 29.4 (-15.4, 74.1)<br>0.4205                         | -11.7 (-27.3, 3.8)<br>0.3785                         | 19.0 (0.0, 37.9)<br>0.3000                       | -3.8 (-19.8, 12.2)<br>0.7253                            | 19.8 (3.8, 35.7)<br>0.2484                           | 63.2 (35.2, 91.1)<br>0.1414                             | 29.7 (11.8, 47.6)<br>0.1903                          |               |
| Other Hispanic     | Reference<br>0.1958                                     | 43.3 (16.3, 70.3)<br>0.1958                          | 13.3 (-9.3, 35.8)<br>0.4549                          | 42.1 (15.4, 68.8)<br>0.1995                      | 21.2 (-9.5, 51.9)<br>0.4049                             | 46.4 (18.3, 74.4)<br>0.1905                          | 24.3 (-10.4, 59.1)<br>0.4012                            | 9.7 (-14.8, 34.2)<br>0.5804                          |               |
| Non-Hispanic White | Reference<br>0.1677                                     | 57.1 (26.9, 87.2)<br>0.1677                          | 4.2 (-7.7, 16.0)<br>0.6163                           | 20.3 (6.8, 33.9)<br>0.2083                       | 2.8 (-14.9, 20.4)<br>0.8086                             | 36.2 (18.9, 53.6)<br>0.1526                          | 20.7 (-4.8, 46.2)<br>0.3579                             | 29.8 (11.4, 48.3)<br>0.1949                          |               |
| Non-Hispanic       | Reference                                               | 29.0 (-31.6, 89.5)                                   | -14.4 (-28.6, -0.2)                                  | 40.5 (11.5, 69.5)                                | -22.8 (-41.0, -4.6)                                     | 4.8 (-19.1, 28.6)                                    | -7.2 (-31.4, 17.0)                                      | 13.3 (-11.2, 37.7)                                   |               |

|                        |           |                            |                           |                           |                           |                          |                           |                          |            |
|------------------------|-----------|----------------------------|---------------------------|---------------------------|---------------------------|--------------------------|---------------------------|--------------------------|------------|
| nic Black              |           | 0.5203                     | 0.2969                    | 0.2232                    | 0.2458                    | 0.7632                   | 0.6631                    | 0.4802                   |            |
| Other Race             | Reference | 78.7 (46.1, 111.4) 0.1327  | -19.9 (-41.3, 1.4) 0.3182 | 26.2 (7.3, 45.2) 0.2249   | -27.0 (-57.3, 3.3) 0.3311 | 4.2 (-24.0, 32.3) 0.8197 | -17.5 (-41.9, 7.0) 0.3946 | 31.5 (-3.5, 66.6) 0.3283 |            |
| <b>Smoking status</b>  |           |                            |                           |                           |                           |                          |                           |                          | 0.007*     |
| None                   | Reference | 80.3 (49.1, 111.6) 0.0001  | 0.9 (-7.3, 9.2) 0.8260    | 28.5 (17.0, 40.0) 0.0002  | 6.9 (-6.1, 19.9) 0.3117   | 33.1 (17.9, 48.2) 0.0007 | 5.7 (-8.5, 19.8) 0.4456   | 30.9 (12.9, 48.9) 0.0042 |            |
| Past smoker            | Reference | 25.5 (-15.3, 66.3) 0.2391  | -12.0 (-29.0, 5.0) 0.1869 | 20.6 (-0.6, 41.8) 0.0763  | -16.1 (-37.3, 5.0) 0.1553 | 23.6 (-3.7, 50.9) 0.1114 | 23.6 (-27.1, 74.2) 0.3762 | 23.0 (2.5, 43.4) 0.0435  |            |
| Current Smoker         | Reference | 37.7 (-11.7, 87.0) 0.1557  | 6.5 (-16.4, 29.4) 0.5872  | 10.5 (-10.6, 31.6) 0.3458 | -15.9 (-37.6, 5.7) 0.1691 | 34.4 (3.3, 65.5) 0.0465  | 12.1 (-24.2, 48.4) 0.5221 | 24.8 (-1.3, 51.0) 0.0827 |            |
| <b>Drinking status</b> |           |                            |                           |                           |                           |                          |                           |                          | <0.0001*** |
| None                   | Reference | 95.1 (65.7, 124.5) <0.0001 | -7.5 (-24.6, 9.7) 0.4069  | 34.8 (11.8, 57.8) 0.0095  | -22.1 (-46.9, 2.7) 0.1015 | 36.6 (12.4, 60.7) 0.0096 | 20.9 (-1.1, 43.0) 0.0821  | 46.7 (19.4, 73.9) 0.0043 |            |
| moderate               | Reference | 93.1 (56.6,                | -0.6 (-13.9, 12.7)        | 30.5 (13.3, 47.8)         | 13.3 (-2.5, 29.2)         | 22.5 (3.0, 42.0)         | 10.5 (-15.1, 36.2)        | 32.1 (9.4, 54.7)         |            |

|       |           |                             |                             |                            |                             |                             |                             |                            |  |
|-------|-----------|-----------------------------|-----------------------------|----------------------------|-----------------------------|-----------------------------|-----------------------------|----------------------------|--|
|       |           | 129.6) 0.0002               | 0.9298                      | 0.0035                     | 0.1207                      | 0.0391                      | 0.4327                      | 0.0141                     |  |
| heavy | Reference | 23.2 (-9.0, 55.4)<br>0.1785 | 0.5 (-12.9, 13.8)<br>0.9469 | 15.6 (0.9, 30.3)<br>0.0550 | -5.7 (-18.5, 7.0)<br>0.3925 | 34.6 (17.9, 51.4)<br>0.0010 | 7.2 (-12.5, 27.0)<br>0.4827 | 23.1 (6.7, 39.5)<br>0.0144 |  |

\* \* \* P<0.001, \* \* P<0.01, \* P<0.05

Results are showed as(for ePWV): survey-weighted coefficients (95%CI) p-value

P-interaction is calculated by global Chi-square test

Abbreviations: ePWV: estimated pulse wave velocity; BMI: body mass index; VFA: visceral fat area; CI, confidence interval.

**Table S3 association of BMI and visceral fat area status with all-cause mortality, weighted**

|  |                        |                    |
|--|------------------------|--------------------|
|  | <b>Number of death</b> | <b>Crude model</b> |
|--|------------------------|--------------------|



|                                                    |    | <b>HR (95% CI)P</b>           |
|----------------------------------------------------|----|-------------------------------|
| <b>Normal Weight</b><br><b>Normal visceral fat</b> | 18 | Reference                     |
| <b>Normal Weight</b><br><b>Visceral Obesity</b>    | 7  | <b>5.47 (0.47,3.25) 0.006</b> |
| <b>Overweight</b><br><b>Normal visceral fat</b>    | 8  | 1.24 (0.47,3.25) 0.664        |
| <b>Overweight</b><br><b>Visceral Obesity</b>       | 10 | 1.18 (0.45,3.08) 0.737        |
| <b>Obese grade 1</b><br><b>Normal visceral fat</b> | 0  | 0(0,0) < 0.001                |
| <b>Obese grade 1</b><br><b>Visceral obesity</b>    | 15 | <b>2.76 (1.01, 7.56) 0.05</b> |

|                                                               |           |                                      |
|---------------------------------------------------------------|-----------|--------------------------------------|
| <p><b>Obese grade 2</b></p> <p><b>Normal visceral fat</b></p> | <p>2</p>  | <p>3.49(0.60,20.19)0.162</p>         |
| <p><b>Obese grade 2</b></p> <p><b>Visceral obesity</b></p>    | <p>13</p> | <p><b>2.37 (1.11,5.08) 0.027</b></p> |

Abbreviations: ePWV: estimated pulse wave velocity; BMI: body mass index; VFA: visceral fat area; CI, confidence interval; HR: hazard ratio
